# Supplementary material for: Do Flower Color and Floral Scent of Silene Species affect Host Preference of Hadena bicruris, a Seed-Eating Pollinator, under Field Conditions?
Source: PLoS One. 2014 Jun 6;9(6):e98755. doi: 10.1371/journal.pone.0098755 (PMC4048206; doi:10.1371/journal.pone.0098755)
Supplement: Table S2 — Crossing design. First- and second generation crosses within and between Silene dioica and S. latifolia, see Table S1 for population information. Family numbers in the first generation of crosses correspond to parents in the second generation. Only second-generation crosses were used in the field transplant experiment. (XLSX) [file pone.0098755.s002.xlsx]

## Sheet: Table S2
Table S2. Crossing design. First- and second generation crosses within and between Silene dioica and S. latifolia, see Supporting Information Table S1 for population information. Family numbers in the first generation of crosses correspond to parents in the second generation. Only second-generation crosses were used in the field transplant experiment.
First generation
			Female parent
			DAV			GOT			SCH			LEU			SUR			GOR
		Ind.	1	2	3	1	2	3	1	2	3	1	2	3	1	2	3	1	2	3
Male parent	DAV	1				7												31
		2							13							27
		3	1											23
	GOT	1		3									21
		2								15										35
		3					9								25
	SCH	1			5							19
		2									17								33
		3						11									29
	LEU-2	1	2											24
		2				8												32
		3							14							28
	SUR	1		4									22
		2					10								26
		3								16										36
	GOR	1			6							20
		2						12									30
		3									18								34
Second generation (used for transplant experiment)
			Female parent
	Family		1	3	5	7	9	11	13	15	17	2	4	6	8	10	12	14	16	18	19	21	23	25	27	29	31	33	35	20	22	24	26	28	30	32	34	36
			Crosses within Silene dioica
Male parent	1							D11		R22	R28
	3								D13
	5							D12		D15
	7				D5						D18
	9				D6				D14
	11		D1	D3
	13					D7	D10			D16
	15		D2			D8
	17			D4								Second-generation hybrids (F2)
	2																			F9
	4														F4														F18
	6															F5						F11		R39
	8																		F8							F15
	10																	F7										F17
	12											F1									F10
	14													F3													F16
	16																F6						F12
	18												F2												F14
	19													F21										F31
	21												F20												F32
	23																F24			R29								R56
	25																	F25									F34
	27														R14							R32
	29											R2																	F36
	31																		F26		F28
	33																						R35
	35															F23										R46				Crosses within Silene latifolia
	20																																L7	L9
	22																																		L11		L14	L16
	24																																		L12		R58	L17
	26																													R31						L13
	28																													L1					R50
	30																															L5
	32																														L3		L8	L10
	34																														L4
	36																															L6
