# Supplementary material for: Do Flower Color and Floral Scent of Silene Species affect Host Preference of Hadena bicruris, a Seed-Eating Pollinator, under Field Conditions?
Source: PLoS One. 2014 Jun 6;9(6):e98755. doi: 10.1371/journal.pone.0098755 (PMC4048206; doi:10.1371/journal.pone.0098755)
Supplement: Table S4 — Ranges of flower color scores and floral scent. Ranges of flower color and occurrence and ranges of floral scent (in ng h−1 per flower) in field-transplanted crosses within Silene dioica, within S. latifolia and in second-generation (F2) hybrids between these species. (XLSX) [file pone.0098755.s004.xlsx]

## Sheet: Table S4
Table S4. Ranges of flower color scores and floral scent. Ranges of flower color and occurrence and ranges of floral scent (in ng h‑1 per flower) in field-transplanted crosses within Silene dioica, within S. latifolia and in second-generation (F2) hybrids between these species.
	Silene dioica			Silene latifolia				F2 hybrids
	Occurrencea	Range		Occurrence	Range		Occurrencea	Range
		Minimum	Maximum		Minimum	Maximum		Minimum	Maximum
Flower colorb		30	100		0	50		0	100
Total scenta		279.26	7803.44		494.748	14389.4		71.95	10842.8
Fatty acid derivates
(Z)-3-Hexenol	6	8.16	275.84	8	5.29355	2387.12	79	0	1733.87
(Z)-3-Hexenyl acetate	6	46.22	6863.77	8	43.3839	7695.07	97	2.92	7850.67
Decanal	6	45.37	273.29	8	61.305	667.474	97	9.48	578.12
Nonanal	6	38.88	290.26	8	38.53	609.37	97	5.99	499.12
Benzenoids
Benzaldehyde	6	2.95	44.08	8	7.95	425.683	97	3.115	518.63
Benzyl alcohol	5	0	29.32	8	1.67	60.2	84	0	154.171
Phenylacetaldehyde	6	0.1	5.67	8	5.01	1492.02	97	0.13	1186.06
Guaiacol	0	0	0	7	0	39.36	22	0	3.34
Methyl benzoate	0	0	0	0	0	0	4	0	0.175
Phenylethyl alcohol	4	0	80.995	8	1.09	74.01	89	0	732.789
Veratrole	1	0	0.1	3	0	43.5	13	0	67.71
Benzyl acetate	1	0	47.7	3	0	2126.49	42	0	255.05
Methyl salicylate	4	0	7.275	8	0.15	12.1371	86	0	46.86
Benzyl benzoate	2	0	0.46	5	0	447.883	30	0	79.59
Cinnamic aldehyde	2	0	59.43	7	0	422.246	59	0	428.31
Cinnamic alcohol	2	0	48.25	7	0	812.46	58	0	1057.55
Anisaldehyde	2	0	1.84	1	0	0.377143	10	0	4.945
Monoterpenoids
α-Pinene	6	17.38	63.03	8	9.08571	121.97	97	0.875	67.81
cis(Z)-ocimene	6	7.95	95.43	7	0	311.83	74	0	699.715
Lilac aldehydes	3	0	18.25	7	0	576.849	71	0	777.17
Lilac alcohols	0	0	0	5	0	21.0343	20	0	60.72
Irregular terpene
6-Methyl-5-hepten-2-one	6	35.02	289.4	8	9.12	367.62	97	3.87	419.39
a occurrence of floral scent compounds: number of individuals with scent compounds detected, N=6 for S. dioica, N=8 for S. latifolia and N=97 for F2 hybrids; b % pink color saturation, N=21 for S. dioica, N=16 for S. latifolia, N=151 for F2 hybrids
