# Supplementary material for: Do Flower Color and Floral Scent of Silene Species affect Host Preference of Hadena bicruris, a Seed-Eating Pollinator, under Field Conditions?
Source: PLoS One. 2014 Jun 6;9(6):e98755. doi: 10.1371/journal.pone.0098755 (PMC4048206; doi:10.1371/journal.pone.0098755)
Supplement: Table S5 — Correlations between flower color and floral scents. Pair-wise Spearman rank correlation coefficients (rs) among flower color and floral scents in 91 field-transplanted second-generation (F2) hybrids between Silene dioica and S. latifolia; P-values significant after false discovery rate control at α = 0.05 are indicated in bold type. (XLSX) [file pone.0098755.s005.xlsx]

## Sheet: Table S5
Table S5. Correlations between flower color and floral scents. Pair-wise Spearman rank correlation coefficients (rs) among flower color and floral scents in 91 field-transplanted second-generation (F2) hybrids between Silene dioica and S. latifolia; P-values significant after false discovery rate control at α = 0.05 are indicated in bold type.
		Flower color	Total scent		(Z)-3-Hexenol	(Z)-3-Hexenyl acetate	Decanal	Nonanal		Benzaldehyde	Benzyl alcohol	Phenylacetaldehyde	Guaiacol	Methyl benzoate	Phenylethyl alcohol	Veratrol	Benzyl acetate	Methyl salicylate	Benzyl benzoate	Cinnamic aldehyde	Cinnamic alcohol	Anisaldehyde		α-Pinene	cis(Z)-Ocimene	Lilac aldehydes	Lilac alcohols
Total scent	rs	-0.046881
	P	0.659013
(Z)-3-Hexenol	rs	0.0224459	0.773614
	P	0.832741	<1.0⋅10-11
(Z)-3-Hexenyl acetate	rs	-0.0354196	0.86028		0.866428
	P	0.738897	<1.0⋅10-11		<1.0⋅10-11
Decanal	rs	-0.188107	0.505903		0.251467	0.293288
	P	0.0741653	3.1⋅10-7		0.0161966	0.0047808
Nonanal	rs	-0.187476	0.477449		0.280758	0.303583	0.770691
	P	0.0751585	1.7⋅10-6		0.00702441	0.0034408	<1.0 10-11
Benzaldehyde	rs	-0.264503	0.436964		0.0681813	0.1	0.634777	0.496878
	P	0.0112893	1.5⋅10-5		0.520766	0.34562	1.4⋅10-11	5.5⋅10-7
Benzyl alcohol	rs	-0.171254	0.51768		0.238689	0.299351	0.285907	0.242779		0.616342
	P	0.104569	1.7⋅10-7		0.0226958	0.00394451	0.0060093	0.0204082		7.8 10-11
Phenylacetaldehyde	rs	-0.165276	0.346983		0.104891	0.1217	0.20677	0.153616		0.499245	0.678005
	P	0.117436	0.000752815		0.322418	0.250486	0.0492406	0.146005		4.7⋅10-7	<1.0⋅10-11
Guaiacol	rs	-0.141794	0.196521		0.118445	0.0468692	0.17884	0.179466		0.168828	0.336991	0.155587
	P	0.180011	0.061898		0.263476	0.659093	0.0898585	0.0887223		0.109652	0.00108945	0.14084
Methyl benzoate	rs	0.0963958	0.232525		0.206991	0.232077	0.116801	0.0426401		0.273999	0.267303	0.079362	0.00408386
	P	0.363369	0.0265562		0.0489934	0.0268575	0.270206	0.688185		0.00858493	0.0104237	0.454593	0.969354
Phenylethyl alcohol	rs	-0.00207953	0.357422		0.114661	0.15132	0.0717851	-0.00767117		0.390799	0.729054	0.823965	0.129385	0.113613
	P	0.984392	0.00050499		0.27914	0.152199	0.498918	0.942468		0.000128178	<1.0⋅10-11	<1.0⋅10-11	0.221582	0.283588
Veratrol	rs	-0.0812433	0.205329		0.173379	0.158987	-0.00956096	0.125863		0.0414938	0.285318	0.101731	0.455916	-0.0832675	0.0979194
	P	0.443935	0.050879		0.100271	0.132255	0.928329	0.234522		0.69615	0.00611839	0.337294	5.6⋅10-6	0.432627	0.355799
Benzyl acetate	rs	-0.0328697	0.0725817		0.000956083	0.0133578	0.0593091	0.150329		0.169309	0.203249	0.171137	-0.0115708	0.143419	0.173906	-0.0883709
	P	0.757089	0.494154		0.992824	0.899994	0.576541	0.154933		0.108628	0.0533232	0.104812	0.913317	0.175023	0.0992261	0.404854
Methyl salicylate	rs	-0.118511	0.303831		0.235374	0.218293	0.202887	0.135584		0.251019	0.419125	0.298891	0.428877	0.0855382	0.327302	0.0912106	0.0958088
	P	0.263206	0.00341318		0.0247079	0.0376417	0.0537589	0.20004		0.0163937	3.5⋅10-5	0.00400311	2.2⋅10-5	0.420138	0.00154124	0.389866	0.366312
Benzyl benzoate	rs	-0.136969	0.244388		0.223008	0.192664	0.204325	0.19497		0.18211	0.444136	0.212974	0.347136	-0.0450535	0.231717	0.427899	0.27373	0.167004
	P	0.19544	0.0195639		0.0336044	0.0672983	0.0520482	0.0640264		0.0840451	1.0⋅10-5	0.0426755	0.000748508	0.671524	0.0271016	2.3⋅10-5	0.00865297	0.113598
Cinnamic aldehyde	rs	-0.016623	0.347439		0.229466	0.165037	0.230091	0.144089		0.430615	0.475742	0.361417	0.225658	0.126748	0.487859	0.0327175	-0.0592692	0.254211	0.0120868
	P	0.875724	0.000740028		0.0286701	0.117974	0.0282274	0.172994		2.0⋅10-5	1.9⋅10-6	0.000431871	0.0314995	0.231222	9.3⋅10-7	0.758179	0.576798	0.0150329	0.909467
Cinnamic alcohol	rs	-0.0185981	0.399658		0.225273	0.199953	0.312924	0.187008		0.466556	0.526815	0.360002	0.250955	0.138528	0.487772	0.0162089	-0.0398969	0.307756	0.0731016	0.944129
	P	0.861097	8.7⋅10-5		0.0317981	0.0573941	0.00252713	0.0759012		3.1⋅10-6	8.1⋅10-8	0.000456574	0.0164222	0.190357	9.4⋅10-7	0.878796	0.707303	0.0030013	0.491058	<1.0⋅ 10-11
Anisaldehyde	rs	-0.058214	0.258567		0.0889725	0.173239	0.386606	0.219584		0.3534	0.251687	0.14992	-0.024288	0.118916	0.184363	-0.0543743	0.202162	0.0714761	0.0401762	0.0336461	0.050658
	P	0.583613	0.0133341		0.401651	0.100551	0.000153524	0.0364975		0.00058993	0.0161004	0.156073	0.819239	0.261566	0.0802166	0.608717	0.0546391	0.500772	0.705348	0.751535	0.633453
α-Pinene	rs	0.127264	0.265282		0.0855963	0.122831	0.302121	0.275706		0.186042	-0.00373214	0.0121278	0.19695	-0.036632	-0.0132314	0.193359	-0.120915	0.176648	0.121575	0.173395	0.228514	-0.138333
	P	0.229313	0.0110424		0.419821	0.246078	0.00360798	0.0081646		0.0774565	0.971992	0.909161	0.0613192	0.730296	0.900935	0.0662987	0.253578	0.0939297	0.250974	0.100239	0.0293569	0.190985
cis(Z)-Ocimene	rs	-0.0806399	0.335332		0.143289	0.195555	0.230141	0.172297		0.324056	0.285823	0.268969	0.142827	0.101806	0.25809	0.052196	-0.100176	0.128792	-0.0991389	0.478951	0.484471	0.137871		0.24009
	P	0.447338	0.00115704		0.175417	0.0632166	0.0281918	0.102442		0.00172687	0.00602473	0.0099366	0.176828	0.336936	0.013512	0.623165	0.344766	0.223722	0.34981	1.6 ⋅10-6	1.1 ⋅10-6	0.192486		0.0218891
Lilac aldehydes	rs	-0.10015	0.422102		0.144316	0.201733	0.351002	0.256725		0.439725	0.488505	0.421235	0.276877	0.142088	0.499136	-0.0771822	0.306833	0.2955	0.161847	0.461471	0.473729	0.242346		-0.0791887	0.298094
	P	0.344896	3.1⋅10-5		0.172312	0.0551654	0.000646589	0.0140312		1.3⋅10-5	9.0⋅10-7	3.2⋅10-5	0.00788682	0.179104	4.8⋅10-6	0.467117	0.00309398	0.00445896	0.125348	4.1⋅ 10-6	2.1⋅ 10-6	0.0206409		0.455581	0.00410627
Lilac alcohols	rs	0.0526291	0.247956		0.108681	0.193516	0.167412	-0.0769244		0.185177	0.321592	0.209343	0.175193	0.148501	0.383212	-0.197748	0.0626757	0.231042	0.0493278	0.275698	0.367523	0.150081		-0.0508086	0.0901608	0.427312
	P	0.62028	0.0177985		0.305144	0.0660744	0.112706	0.46861		0.0788692	0.00188106	0.0464231	0.0967134	0.160072	0.000177351	0.0602561	0.555054	0.0275642	0.642408	0.00816647	0.000338681	0.155623		0.632442	0.395368	2.4⋅10-5
6-Methyl-5-hepten-2-one	rs	-0.087951	0.596544		0.339637	0.459739	0.749358	0.634719		0.379678	0.276161	0.192786	0.177235	0.0305789	0.189875	-0.0101839	0.0824836	0.344608	0.199961	0.151373	0.262531	0.28529		0.413013	0.218203	0.343904	0.193617
	P	0.407099	4.4⋅10-10		0.000989035	4.6⋅10-6	<1.0⋅10-11	1.4⋅10-11		0.000205761	0.00805559	0.067122	0.0928262	0.773547	0.0714364	0.923674	0.436986	0.000822873	0.0573836	0.152053	0.0119361	0.00612377		4.7⋅10-5	0.0377226	0.000844747	0.0659306
